# Supplementary material for: Combined Impacts of ENSO and MJO on the 2015 Growing Season Drought over the Canadian Prairies
Source: Copernicus journal article supplement (doi:10.5194/hess-2018-56), 2018-02-23
Supplement: Supplementary file [file hess-2018-56-AC1-supplement.pdf]

## **Anonymous Referee #1**

Received and published: 31 March 2018

Generally, there is value (new information) in them on how MJO amplifies drought in western Canada. I have concerns around the following which the authors may want to attend to before final acceptance.

1. As pointed out in the comments, there are obvious lapses in spelling and writing which must be corrected.
2. Although the title of the ms refers to the Canadian Prairies, the reality is that it only covers Alberta and Saskatchewan (Figure 1). The Prairies include MB. It would also seem that coastal BC was affected most by the 2015 drought according to Figure 1 but does not enter into their discussion much. Why?
3. Structurally, a section under results (lines 131 to 141) are actually part of methods/study area.
4. The generation of a Rossby wave train (mechanism for delivery of drought conditions) is purely circumstantial from the graphics. There are equations and alluded to which should be used to ascertain this. It will be interesting to know why the authors did not do this when they had all the data (geopotential heights, OLR etc)

Please also note the supplement to this comment: <https://www.hydrol-earth-syst-sci-discuss.net/hess-2018-56/hess-2018-56-RC1-supplement.pdf>

We thank the reviewer for thoroughly review our draft. The following comments addresses the points that were raised by the reviewer #1's comments.

1. We thank the reviewer for pointing out these errors in the supplementary PDF. We have checked the draft thoroughly to remove spelling errors.
2. We have changed the title to "Combined Impacts of ENSO and MJO on the 2015 Growing Season Drought over western and central Canadian Prairies". The BC coast experienced large precipitation deficit in percentage in 2015 but unlike the prairies where summer precipitation is highest among all seasons, the summer months at BC coast are the driest. We want to focus on the growing season drought of the Prairie provinces due to the deficit in precipitation in summer is more critical in this climate zone.
3. We have removed part of discussion line 131-141 in the result to methods
4. We have conducted more analysis on the wave propagation and added them in the discussion section.
